# Supplementary material for: Establishment and Characterization of an Acute Model of Ocular Hypertension by Laser-Induced Occlusion of Episcleral Veins
Source: PubMed Central journal article supplement — Invest Ophthalmol Vis Sci. 2017 Aug;58(10):3879–86. doi: 10.1167/iovs.16-20807 (PMC6108309; doi:10.1167/iovs.16-20807), 2017-08
Supplement: iovs-58-09-29_s01.pdf [file iovs-58-09-29_s01.pdf]

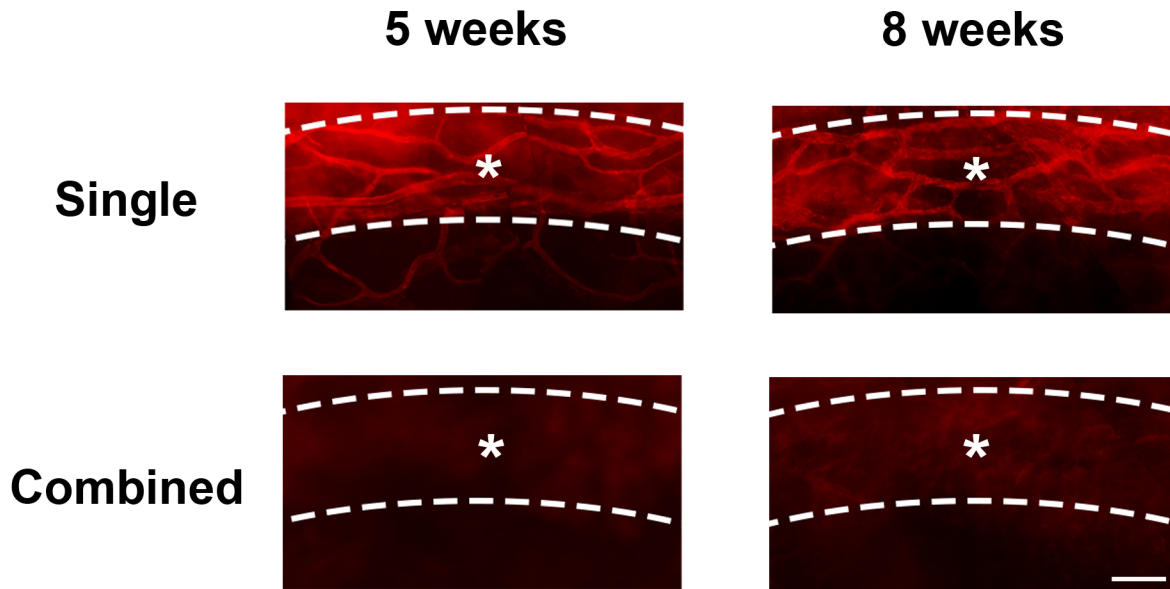

**Supplementary Figure 5.** Immunofluorescent microscopic analysis showing better preserved limbal vessels after single versus combined laser treatment at day 7 post-procedure in mice aged 5 or 8 weeks ( $n = 6/\text{group}$ ). Limbal vessels were not detectable at the site of laser photocoagulation after combined treatment. White dotted lines designate the borders of the limbus where limbal vessels were located, as indicated by the white asterisks. Scale bar: 100  $\mu\text{m}$ .
