# Supplementary material for: Establishment and Characterization of an Acute Model of Ocular Hypertension by Laser-Induced Occlusion of Episcleral Veins
Source: PubMed Central journal article supplement — Invest Ophthalmol Vis Sci. 2017 Aug;58(10):3879–86. doi: 10.1167/iovs.16-20807 (PMC6108309; doi:10.1167/iovs.16-20807), 2017-08
Supplement: iovs-58-09-29_s02.pdf [file iovs-58-09-29_s02.pdf]

**A**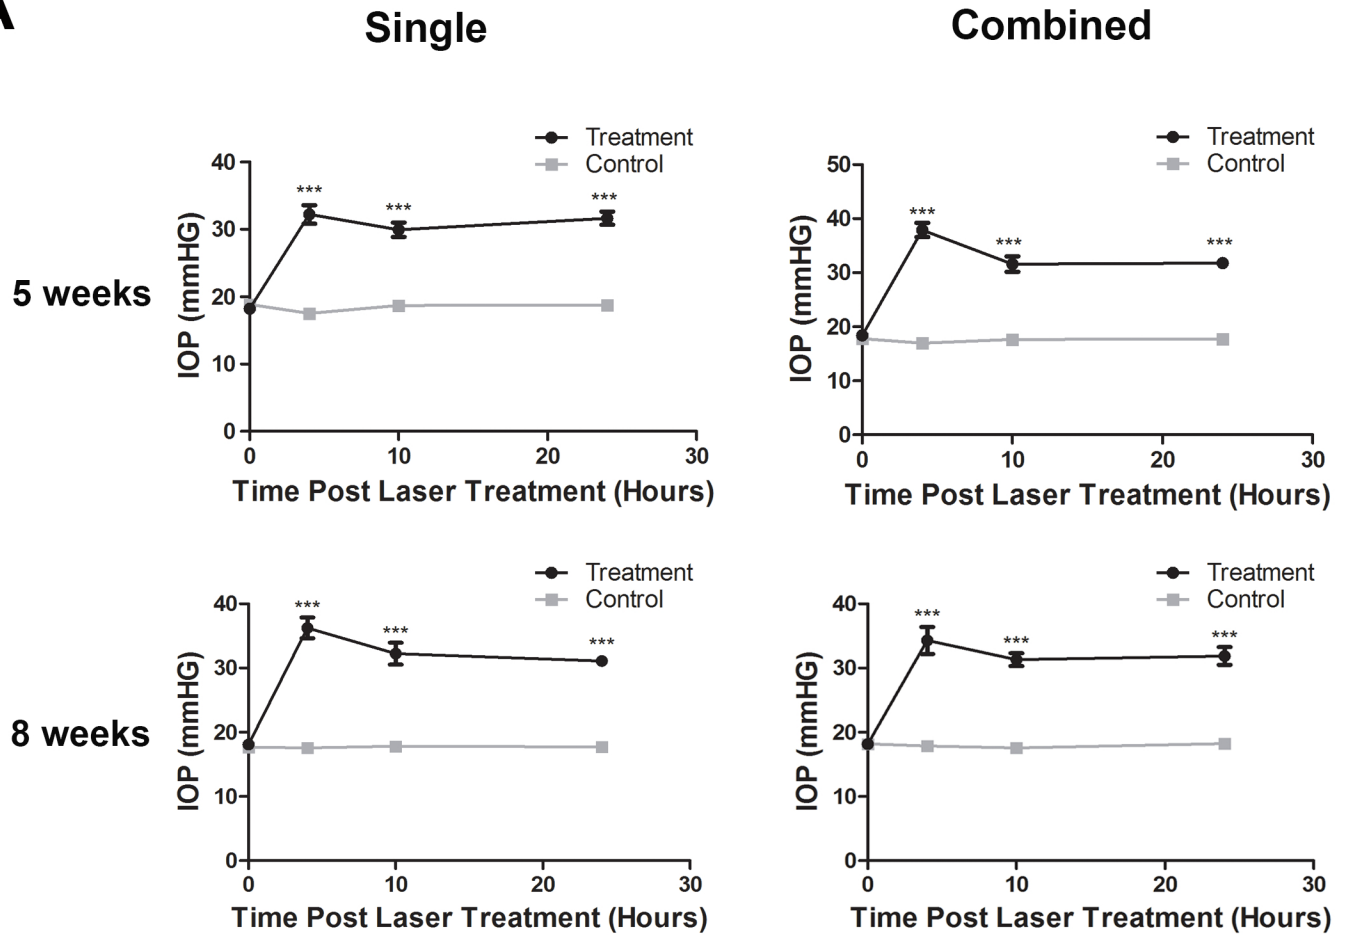**B**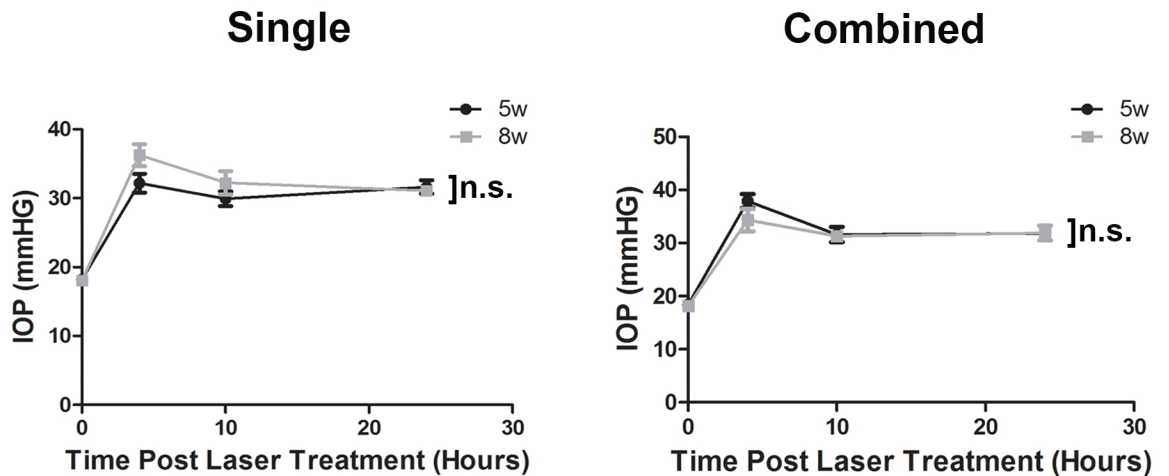

**Supplementary Figure 2.** IOP measurements at 4, 10 and 24 hours after single or combined laser treatment in mice aged 5 or 8 weeks ( $n = 12/\text{group}$ ). (A) IOP elevation after single or combined laser treatment, as compared with control contralateral eyes, in mice aged 5 or 8 weeks. \*\*\*  $P < 0.001$ . (B) No significant difference was found with single versus combined treatment. n.s.: not significant.
