# Supplementary material for: Establishment and Characterization of an Acute Model of Ocular Hypertension by Laser-Induced Occlusion of Episcleral Veins
Source: PubMed Central journal article supplement — Invest Ophthalmol Vis Sci. 2017 Aug;58(10):3879–86. doi: 10.1167/iovs.16-20807 (PMC6108309; doi:10.1167/iovs.16-20807), 2017-08
Supplement: iovs-58-09-29_s03.pdf [file iovs-58-09-29_s03.pdf]

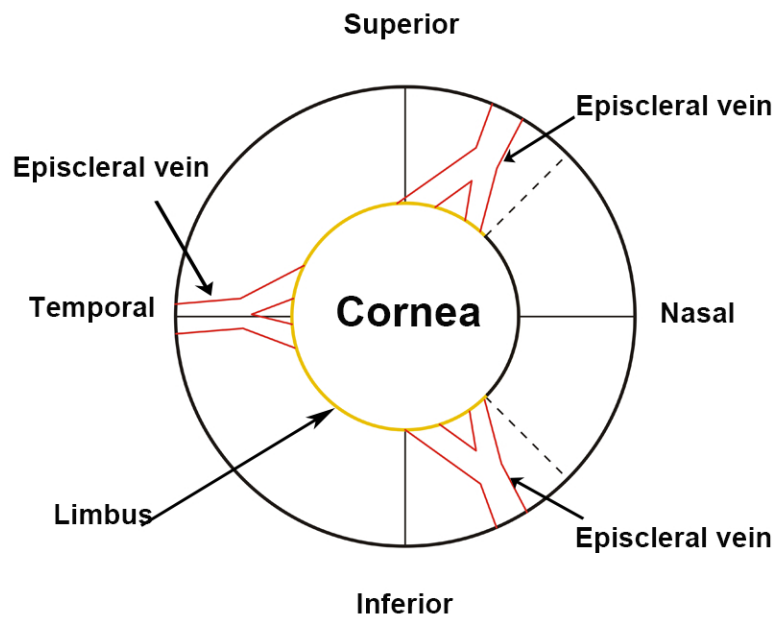

**Supplementary Figure 1.** Schematic diagram demonstrating the locations of episcleral veins (red) and limbal vessels (yellow) in CD1 mice. Nasal aspect of 90 degree, as indicated between the black dotted lines, was spared from laser treatment.
