# Supplementary material for: Establishment and Characterization of an Acute Model of Ocular Hypertension by Laser-Induced Occlusion of Episcleral Veins
Source: PubMed Central journal article supplement — Invest Ophthalmol Vis Sci. 2017 Aug;58(10):3879–86. doi: 10.1167/iovs.16-20807 (PMC6108309; doi:10.1167/iovs.16-20807), 2017-08
Supplement: iovs-58-09-29_s04.pdf [file iovs-58-09-29_s04.pdf]

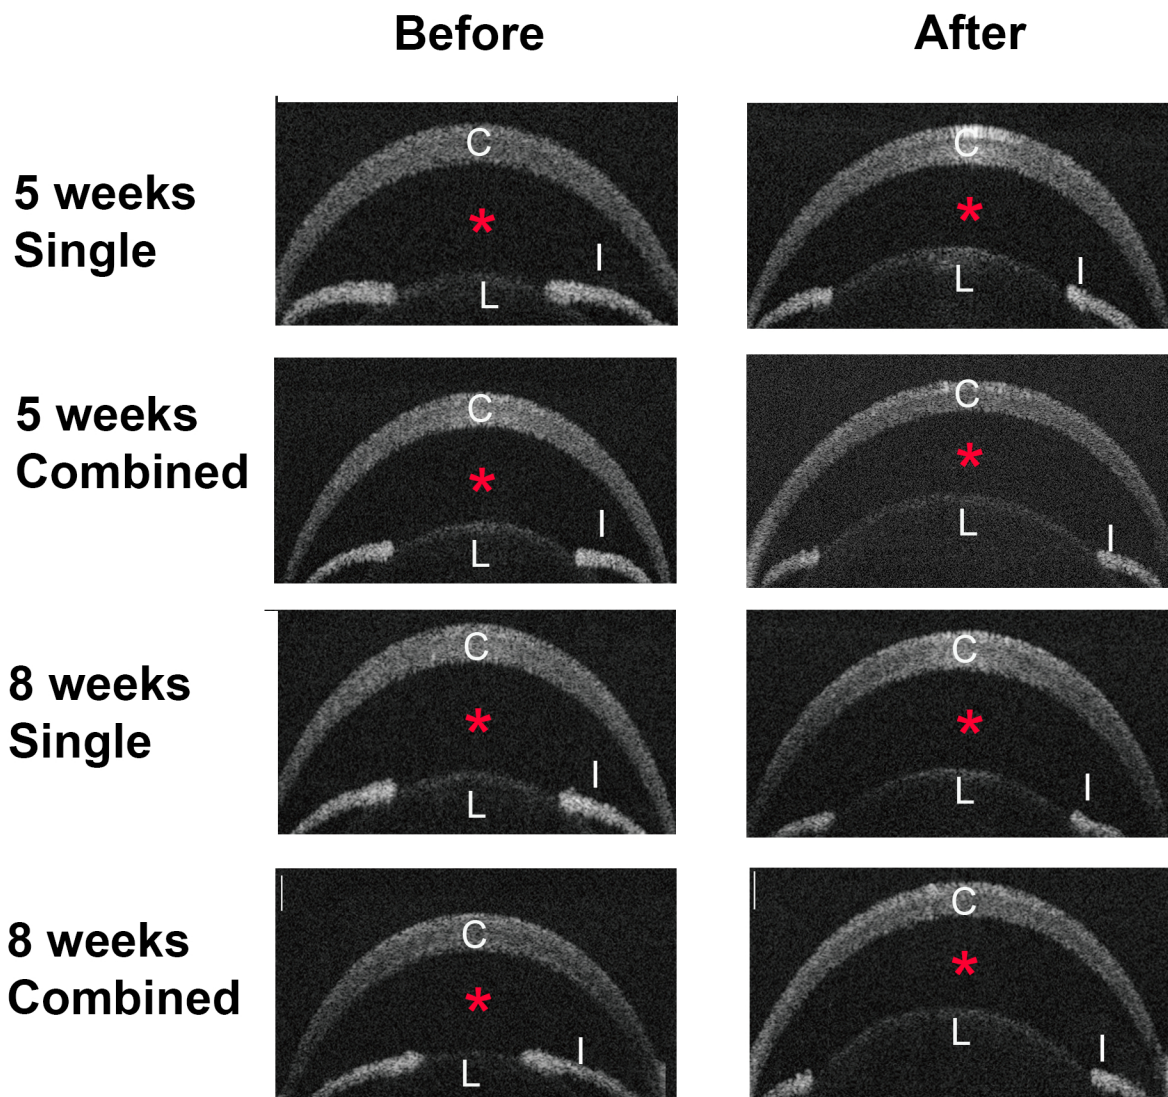

**Supplementary Figure 4.** High resolution OCT evaluation showing no inflammatory cells were detected in the anterior chamber (indicated by red star) after single or combined treatment in mice aged 5 or 8 weeks (n = 3-6/group). C, cornea; L, lens; I, iris. Scale bar: 200  $\mu$ m.
