# Supplementary material for: Establishment and Characterization of an Acute Model of Ocular Hypertension by Laser-Induced Occlusion of Episcleral Veins
Source: PubMed Central journal article supplement — Invest Ophthalmol Vis Sci. 2017 Aug;58(10):3879–86. doi: 10.1167/iovs.16-20807 (PMC6108309; doi:10.1167/iovs.16-20807), 2017-08
Supplement: iovs-58-09-29_s05.pdf [file iovs-58-09-29_s05.pdf]

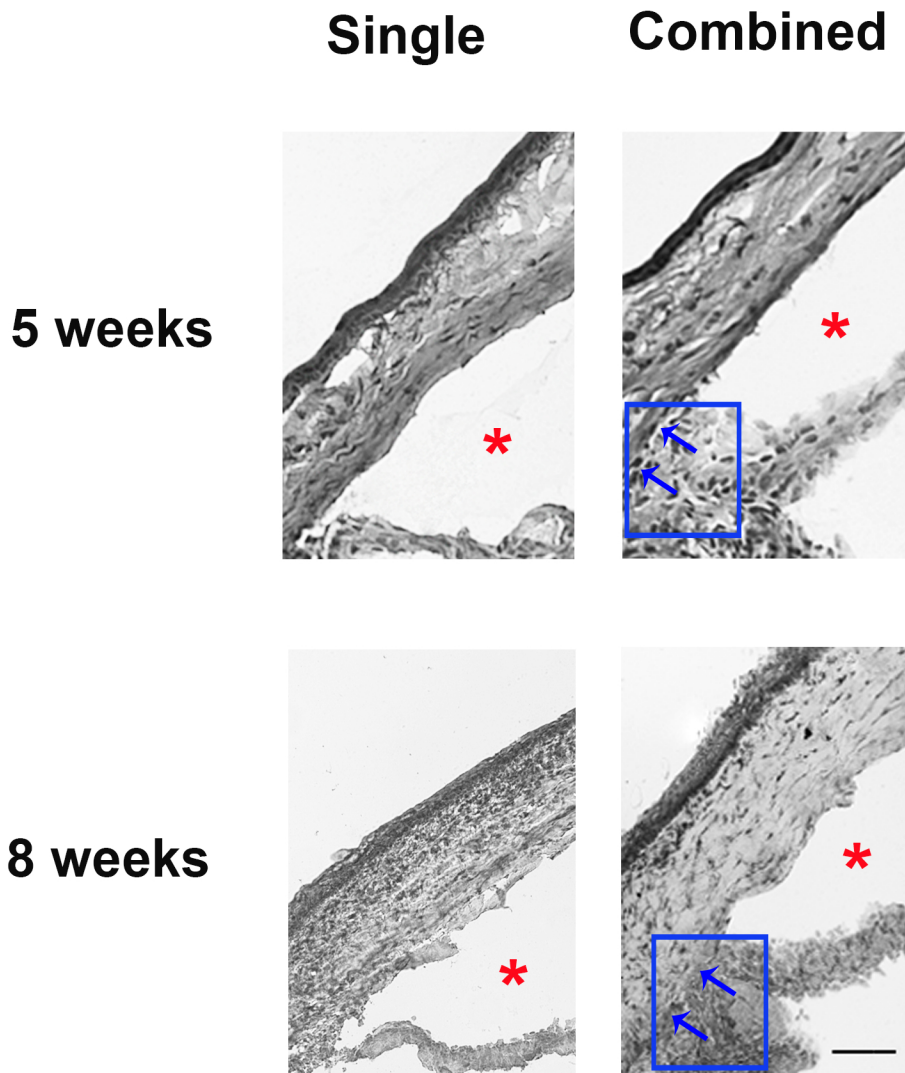

**Supplementary Figure 3.** Histologic analysis of the anterior chamber with H&E staining showing no inflammatory cells were detected in the anterior chamber (indicated by red star) after single or combined treatment in mice aged 5 or 8 weeks at 7 days post-procedure (n = 6/group). Blue arrow inside rectangle shows the presence of peripheral anterior synechiae. Scale bar: 100  $\mu$ m.
